# Supplementary material for: Optimization of a Cryopreservation Method for the Endangered Korean Species Pogostemon yatabeanus Using a Systematic Approach: The Key Role of Ammonium and Growth Regulators
Source: MDPI journal article supplement (doi:10.3390/plants10102018), 2021-09-26
Supplement: s1 [file s1]

## Supplementary materials

**Figure S1** (Complementary to Table 3). Effect of ammonium nitrate and growth regulators at three regrowth steps on plant regeneration of cryoprotected (LNC) and cryopreserved (LN) *Pogostemon yatabeanus* shoot tips. Photographs were taken 6 weeks after treatment. Data on survival and regeneration are presented in Table 3.

| No. | Regrowth steps*                 |                     |                     |                     | LNC                                                                                  | LN                                                                                    |
|-----|---------------------------------|---------------------|---------------------|---------------------|--------------------------------------------------------------------------------------|---------------------------------------------------------------------------------------|
|     | Step 1                          |                     | Step 2              | Step 3              |                                                                                      |                                                                                       |
|     | 5 days                          |                     | 23 days             | 14 days             |                                                                                      |                                                                                       |
|     | NH <sub>4</sub> NO <sub>3</sub> | GA <sub>3</sub> +BA | GA <sub>3</sub> +BA | GA <sub>3</sub> +BA |                                                                                      |                                                                                       |
| 1   | -                               | +                   | +                   | -                   |    |    |
| 2   | -                               | +                   | -                   | -                   |   |   |
| 3   | -                               | -                   | +                   | -                   |  |  |
| 4   | -                               | -                   | -                   | -                   |  |  |
| 5   | +                               | +                   | +                   | -                   |  |  |

---

|   |   |   |   |   |
|---|---|---|---|---|
| 6 | + | - | - | - |
|---|---|---|---|---|

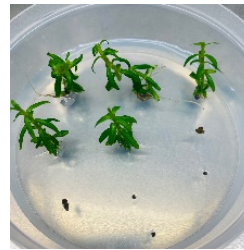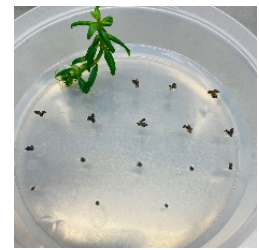

---

|   |   |   |   |   |
|---|---|---|---|---|
| 7 | - | + | + | + |
|---|---|---|---|---|

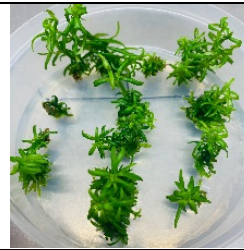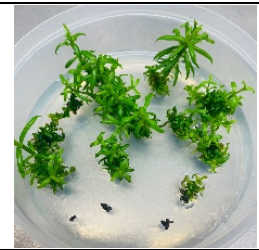

---

\* Step 1 was performed on MS medium with (+) or without (-) growth regulators (1 mg/l GA<sub>3</sub> + 1 mg/l BA) and/or ammonium nitrate in darkness. Steps 2 and 3 were performed on MS medium containing ammonium nitrate with (+) or without (-) 1 mg/l GA<sub>3</sub> + 1 mg/l BA under light (40  $\mu\text{E m}^{-2} \text{s}^{-1}$ ).
